# Supplementary material
Source: MDPI journal article supplement (https://www.mdpi.com/2311-5629/6/4/78)
Supplement: s1 [file s1]

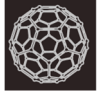

Supplementary Materials

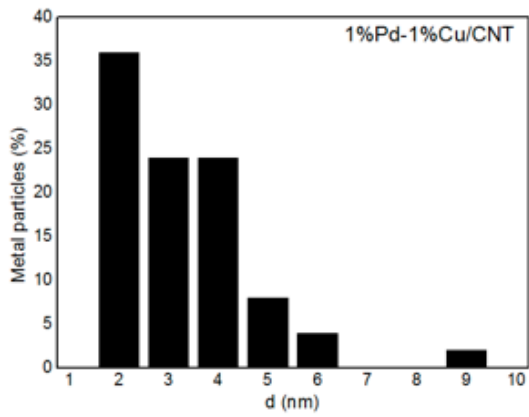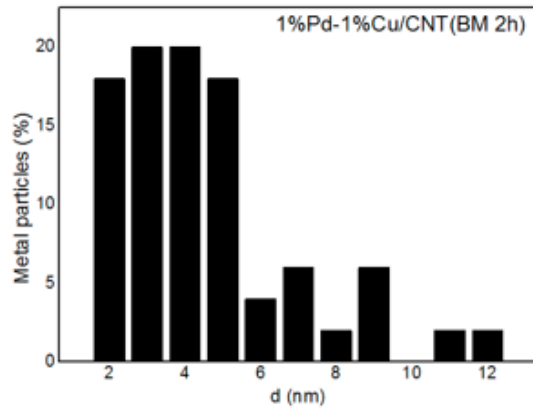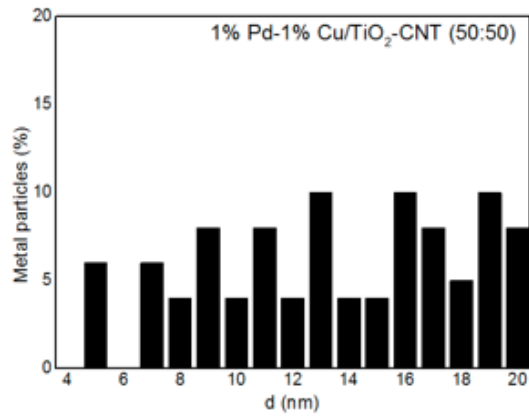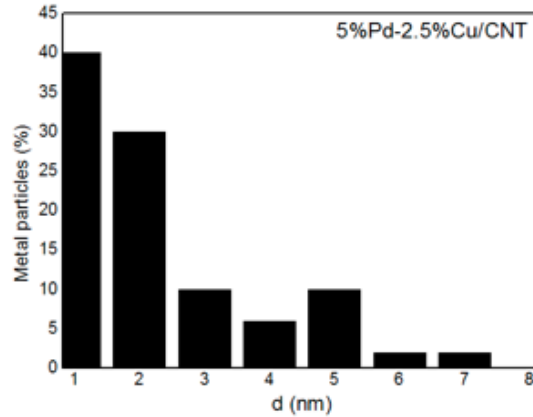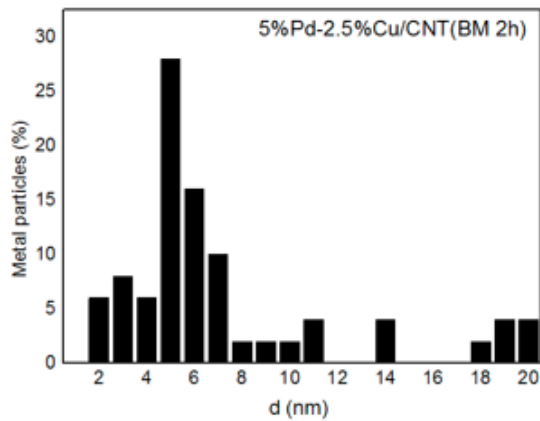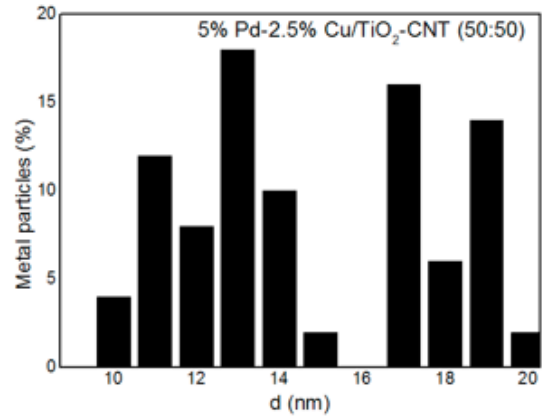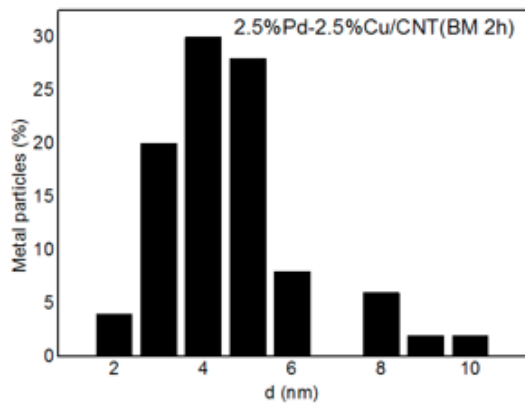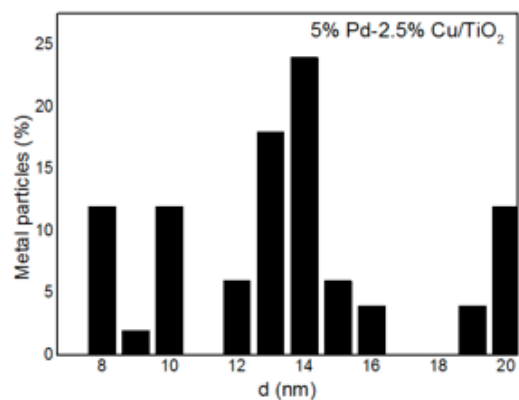

**Figure S1.** Metal particle size distribution for the synthesized catalysts.

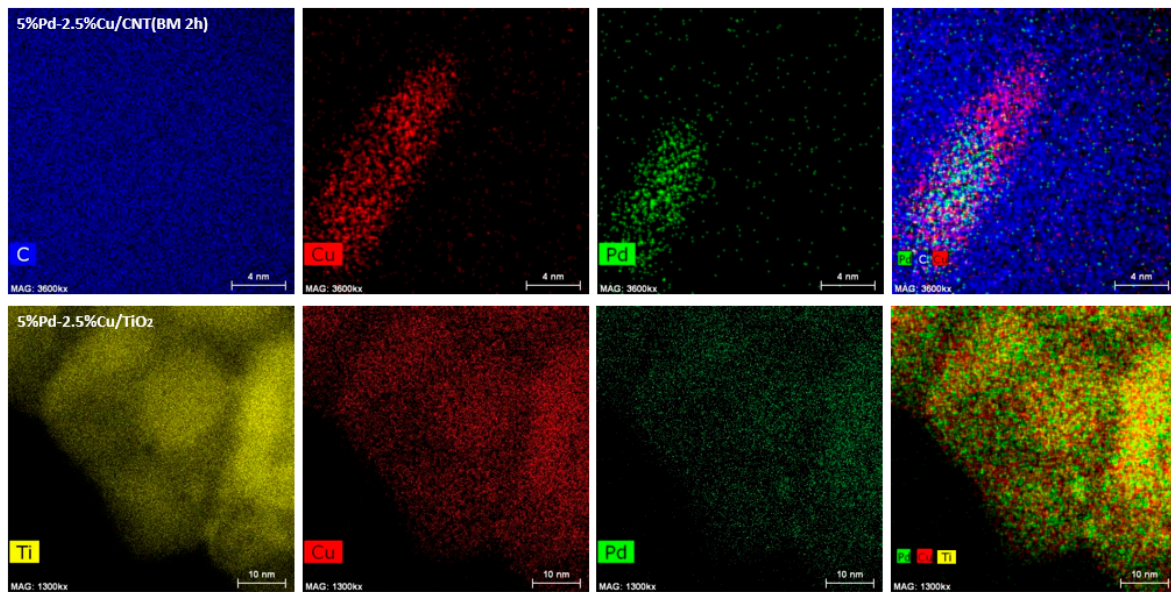

**Figure S2.** EDX images obtained for 5% Pd-2.5% Cu/CNT(BM 2h) and 5% Pd-2.5% Cu/TiO<sub>2</sub> catalysts.

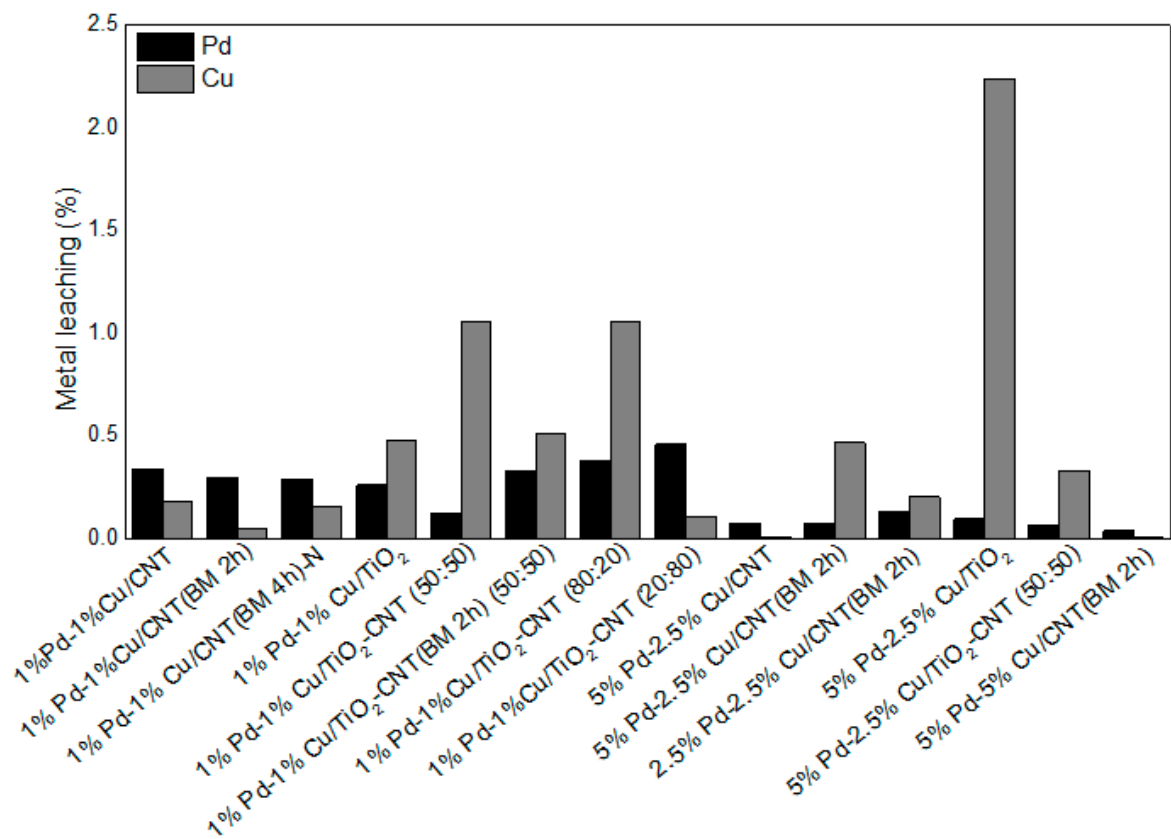

**Figure S3.** Pd and Cu leached during NO<sub>3</sub><sup>-</sup> catalytic reduction experiments performed for all the synthesized catalysts.

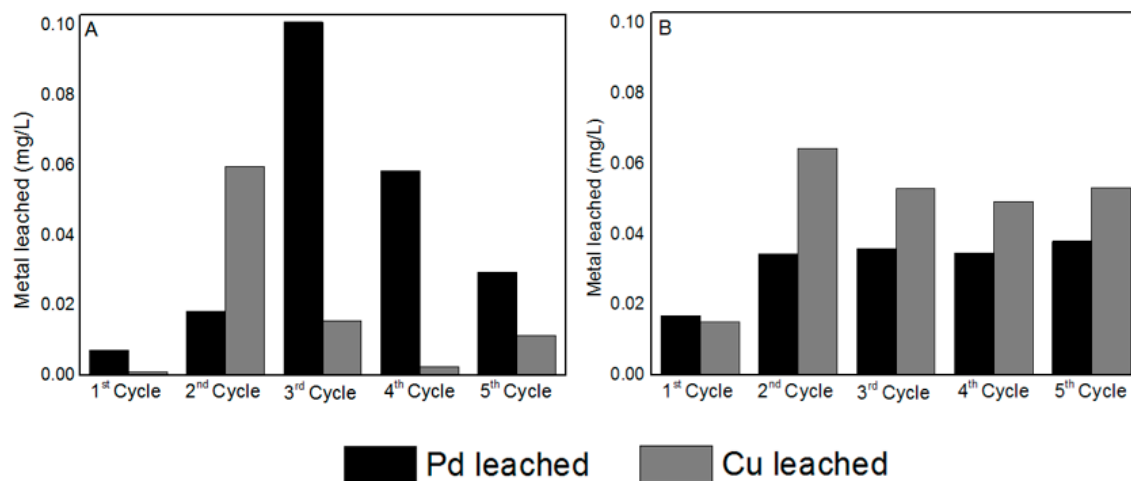

**Figure S4.** Pd and Cu leached during stability experiments performed with: (A) 5% Pd-2.5% Cu/CNT(BM 2h) and (B) 2.5% Pd-2.5% Cu/CNT(BM 2h).
